# Supplementary material for: Cardiac, renal and uterine hemodynamics changes throughout pregnancy in rats with a prolonged high fat diet from an early age
Source: PLoS One. 2020 Jun 30;15(6):e0234861. doi: 10.1371/journal.pone.0234861 (PMC7326224; doi:10.1371/journal.pone.0234861)
Supplement: S1 Data — (XLS) [file pone.0234861.s001.xls]

## Sheet: Hoja2
		Body Weight (g)
		Days of pregnancy
Group	ID	Pre-pregnancy	7	14	19
Normal Fat Diet	NFD1	220	237	262	338
	NFD2	234	262	286	341
	NFD3	231	242	286	374
	NFD4	218	235	277	365
	NFD5	245	247	279	282
	NFD6	250	252	271	307
	NFD7	242	254	280	306
	NFD8	256	254	283	296
High Fat Diet	HDF1	279	293	327	391
	HDF2	259	268	280	310
	HDF3	246	294	306	350
	HDF4	290	311	322	384
	HDF5	274	296	316	357
	HDF6	261	287	307	338
	HDF7	291	324	325	353
	HDF8	291	308	325	357
		Ultrasound parameters
RENAL HEMODYNAMIC
		Renal diameter (mm)					PSV (mm/s)				EDV (mm/s)				VTI (mm/s)				RBF (ml/min)				GFR (ml/min)				GFR (ml/min/100 gr)				Arterial pressure (mmHg)
		Days of pregnancy					Days of pregnancy				Days of pregnancy				Days of pregnancy				Days of pregnancy				Days of pregnancy				Days of pregnancy				Days of pregnancy
Group	ID	Pre-pregnancy	7	14	19		Pre-pregnancy	7	14	19	Pre-pregnancy	7	14	19	Pre-pregnancy	7	14	19	Pre-pregnancy	7	14	19	Pre-pregnancy	7	14	19	Pre-pregnancy	7	14	19	Pre-pregnancy	7	14	19
Normal Fat Diet	NFD1	0.492857	0.5825	0.657143	0.656		677.95	769.288	723.075	669.511	247.518	200.203	233.291	265.538	60.6225	76.591	90.0395	64.127	5.01	7.19	10.74	9.5	2.09	2.6544	3.013	5.45	0.95	1.12	1.15	1.61243	112	93	95	98
	NFD2	0.676167	0.675833	0.68275	0.583333		719.959	698.226	759.674	657.396	218.973	265.973	234.749	247.368	81.7325	88.9387	83.1025	82.202	9.06	9.74	9.92	7.05	2.223	2.9082	3.24	3.78	0.95	1.11	1.13287	1.1085	98	111	85	98
	NFD3	0.600238	0.703667	0.648	0.565143		780.232	548.631	649.214	772.411	285.929	219.934	216.386	204.873	93.6625	74.59	72.566	81.1535	8.83	8.93	8.26	7.01	2.4255	2.9282	2.7456	4.18	1.05	1.21	0.96	1.11765	109	97	102	89
	NFD4	0.603333	0.593452	0.6985	0.675833		789.637	530.85	830.674	892.599	382.233	229.467	377.012	212.351	82.7675	77.5203	90.365	88.73	10.32	6.55	13.16	11.19	2.071	2.6555	3.2132	4.14	0.95	1.13	1.16	1.13425	106	95	95	116
	NFD5	0.628333	0.725	0.685833	0.706667		905.929	526.678	943.335	565.64	226.527	208.813	308.238	204.535	91.6733	55.0367	82.84	56.68	9.62	8.6971	12.2774	8.11476	2.41	3.46	3.6	3.4	0.983673	1.40081	1.29032	1.20567	117	113	119	118
	NFD6	0.67	0.6225	0.691667	0.64		505.24	1026.17	602.372	519.688	199.81	259.977	185.284	185.571	53.635	88.9983	60.88	57.3317	7.20168	9.68753	8.31797	6.84494	2.62	2.36	3.08	4.59	1.048	0.936508	1.13653	1.49511	107	98	92	102
	NFD7	0.7325	0.774167	0.741667	0.8025		499.815	572.752	768.58	731.082	140.822	234.027	162.888	173.782	48.225	52.5175	59.4158	50.8425	7.23881	10.387	9.56382	10.6727	2.25	2.62	4.1	3.74	0.929752	1.0315	1.46429	1.22222	121	120	102	94
	NFD8	0.65	0.71	0.7275	0.699167		687.76	599.503	705.343	521.855	222.98	185.502	238.647	156.945	71.3225	53.3975	69.1892	54.0825	8.33266	7.72851	10.1979	6.76769	2.56	3.4	3.17	3.14	1	1.33858	1.12014	1.06081	111	107	97	101
High Fat Diet	HDF1	0.626667	0.556667	0.5925	0.71		728.475	833.107	647.593	537.658	289.688	381.263	213.607	81.81	80.2117	84.4	60.4567	38.8567	9.03272	8.59944	6.30736	4.79958	3.91	4.01	3.56	3.52	1.40143	1.3686	1.08869	0.900256	124	106	115	114
	HDF2	0.636667	0.7075	0.7025	0.7875		564.945	837.919	861.998	779.474	256.428	280.198	354.632	270.68	58.6692	71.4675	81.2217	73.6333	7.4334	12.0804	13.3989	14.4421	3.45	3.74	2.56	3.56	1.33205	1.39552	0.914286	1.14839	112	130	145	118
	HDF3	0.675	0.7375	0.7975	0.63		688.976	714.822	750.395	596.312	282.327	248.137	219.859	201.188	82.01	71.8142	72.045	55.6125	10.1602	11.7854	12.5961	6.86878	2.41	2.62	3.46	3.52	0.979675	0.891156	1.13072	1.00571	121	135	119	115
	HDF4	0.6075	0.6	0.8375	0.585		650.295	754.547	684.3	748.97	216.26	267.697	236.59	83.9825	85.3475	82.5875	70.6375	51.39	7.42677	8.30001	13.758	4.59747	3.33	3.98	2.98	3.96	1.14828	1.27974	0.925466	1.03125	113	119	111	116
	HDF5	0.7525	0.7525	0.7275	0.75		449.883	465.565	580.34	543.678	132.57	144.925	180.715	184.113	46.58	50.0525	54.8575	53.4875	7.02002	7.54509	7.95805	9.27243	2.9	4.95	3.93	3.4	1.05839	1.6723	1.24367	0.952381	140	117	122	109
	HDF6	0.7675	0.6375	0.745	0.6825		496.67	494.587	681.673	620.105	233.22	355.197	246.29	158.718	68.1775	90.5775	68.4575	63.2325	10.6289	10.5439	11.0036	8.60074	2.99	3.41	3.54	3.57	1.14559	1.18815	1.15309	1.05621	121	137	113	119
	HDF7	0.715	0.71	0.855	0.8075		536.475	812.543	630.19	474.277	230.435	374.062	240.485	196.142	60.39	88.7475	61.43	48.51	8.70682	13.4322	13.8447	9.60481	2.79	3.4	3.36	3.13	0.958763	1.04938	1.03385	0.886686	126	136	134	125
	HDF8	0.6875	0.7625	0.745	0.71		736.678	596.267	881.01	614.353	297.06	274.097	277.575	168.09	96.1625	74.5725	92.82	54.96	12.1294	10.9548	14.7867	8.31	2.67	4.35	3.37	3.52	0.917526	1.41234	1.03692	0.985994	126	136	114	98
		Ultrasound parameters
CARDIAC HEMODYNAMIC
		Hear Rate (beats/min)					Cardiac Output (ml/min)				Stroke volume (ml)
		Days of pregnancy					Days of pregnancy				Days of pregnancy
Group	ID	Pre-pregnancy	7	14	19	19	Pre-pregnancy	7	14	19	Pre-pregnancy	7	14	19
Normal Fat Diet	NFD1	318.5	327.92	357	331		48.52	69.65	64.92	68.98	0.152339	0.212399	0.181849	0.208399
	NFD2	369	366	420	384		48.52	56.28	50.73	70.01	0.131491	0.15377	0.120786	0.182318
	NFD3	302.5	368	362	382.5		34.96	69.28	65.33	62.79	0.11557	0.188261	0.18047	0.164157
	NFD4	350.5	356	383	366		35.68	56.94	57.32	76.49	0.101797	0.159944	0.149661	0.208989
	NFD5	338	382.75	402	365		42.87	59.19	80.97	70.55	0.126834	0.154644	0.201418	0.193288
	NFD6	380.75	358.5	363.5	371		53.47	59.88	60.09	62.93	0.140433	0.167029	0.165309	0.169623
	NFD7	356.5	413.25	371.5	415		73.36	67.9	79.88	91.64	0.205778	0.164307	0.21502	0.220819
	NFD8	353	365	355.25	326.5		50.76	59.53	44.4	62.29	0.143796	0.163096	0.124982	0.190781
High Fat Diet	HDF1	363	404	378	379		49.5	47.88	36.85	73.1	0.13	0.13	0.1	0.2
	HDF2	397.25	436	427	402		67.51	70.12	80.64	62.94	0.17	0.16	0.19	0.16
	HDF3	346.25	383.5	350	397		72.79	51.73	88.19	71.38	0.21	0.13	0.25	0.18
	HDF4	299	355.5	353.5	332		43.535	67.46	91.475	66.04	0.15	0.19	0.26	0.2
	HDF5	339	340	348	393		61.7275	61.395	75.95	100.21	0.18	0.18	0.22	0.25
	HDF6	337.5	365	369	373		48.855	59.83	74.435	90	0.145	0.154	0.2015	0.2415
	HDF7	359	383.5	392.25	383		55.72	67.595	73.0475	54.04	0.1555	0.1785	0.186	0.141
	HDF8	340	337	348.5	380		59.44	71.42	59.69	75.1	0.18	0.16	0.21	0.2
		Ultrasound parameters
UTERINE ARTERY HEMODYNAMIC
		PSV (mm/s)			EDV (mm/s)				TAV (mm/s)			VTI (mm/s)
		Days of pregnancy			Days of pregnancy				Days of pregnancy			Days of pregnancy
Group	ID	7	14	19	7	7	14	19	7	14	19	7	14	19
Normal Fat Diet	NFD1	330.6	711.783	768.415	59.32	318.058	318.058	244.407	191.437	511.41	499.785	21.98	76.5967	80.4883
	NFD2	425.353	556.672	654.64	111.338	223.67	223.67	279.24	269.43	392.28	468.008	36.145	51.5183	68.0967
	NFD3	373.803	509.595	708.062	131.383	216.215	216.215	242.806	245.203	362.22	492.497	34.6833	52.9717	72.6058
	NFD4	379.09	592.267	682.997	154.18	278.747	278.747	234.897	264.584	437.368	463.622	37.7483	64.1333	65.4517
	NFD5	289.707	618.517	770.51	117.825	231.283	231.283	268.289	204.845	426.717	499.863	31.2558	58.1425	75.355
	NFD6	537.447	664.902	822.699	149.403	283.114	283.114	332.298	349.982	471.226	576.775	48.1417	65.195	87.8083
	NFD7	552.703	530.848	592.903	158.195	231.765	231.765	286.89	341.566	374.45	424.73	42.0142	56.775	57.83
	NFD8	336.09	584.779	641.388	146.328	249.472	249.472	248.89	236.905	410.83	435.023	36.8617	62.6508	69.3325
High Fat Diet	HDF1	688.097	605.863	511.103	240.87	233.685	233.685	209.757	466.107	416.372	370.137	56.4567	54.045	61.82
	HDF2	580.775	587.447	807.369	232.222	251.327	251.327	254.53	411.598	400.545	526.273	51.2367	55.8375	71.9025
	HDF3	688.097	688.097	824.14	240.87	240.87	240.87	287.49	466.107	466.107	557.438	56.4567	56.4567	73.4025
	HDF4	781.655	732.892	1144.14	307.402	306.11	306.11	403.82	534.367	522.105	770.275	82.625	79.91	114.015
	HDF5	589.025	703.133	374.123	203.795	270.752	270.752	170.347	392.132	486.402	267.702	58.92	71.845	37.335
	HDF6	650.482	535.54	603.442	223.387	201.895	201.895	193.608	435.517	361.618	409.175	61.5225	47.6925	52.445
	HDF7	543.003	579.398	937.457	172.045	172.99	172.99	229.3	363.688	382.857	550.045	45.11	50.2425	67.745
		Ultrasound parameters
RADIAL ARTERIES HEMODYNAMIC
		PSV (mm/s)			EDV (mm/s)				TAV (mm/s)			VTI (mm/s)
		Days of pregnancy			Days of pregnancy				Days of pregnancy			Days of pregnancy
Group	ID	7	14	19	7	7	14	19	7	14	19	7	14	19
Normal Fat Diet	NFD1	97.545	145.698	248.91	51.63	76.0811	76.0811	139.986	71.3417	104.809	192.561	12.0117	17.18	32.2842
	NFD2	74.94	135.415	161.903	38.6383	78.2383	78.2383	91.9817	54.3717	105.203	125.325	8.43333	14.8267	22.1583
	NFD3	83.1578	99.9656	112.636	44.8111	43.9367	43.9367	46.8833	62.8044	69.53	79.6489	9.89556	11.3111	12.9444
	NFD4	99.0089	124.349	166.075	62.1589	77.8444	77.8444	90.85	78.83	97.3433	129.982	12.56	15.53	21.2083
	NFD5	89.005	170.422	172.262	56.2533	80.6967	80.6967	76.0167	68.5483	115.938	115.682	11.125	18.3767	17.31
	NFD6	71.2333	163.439	177.731	39.8628	89.4078	89.4078	46.1861	53.2126	128.455	108.159	8.45	20.7117	14.7967
	NFD7	80.6863	119.778	281.946	51.4675	56.1708	56.1708	157.784	62.6412	86.15	209.978	9.67375	14.3042	31.0589
	NFD8	73.1308	115.17	248.598	43.885	57.9883	57.9883	132.689	56.8067	82.8339	178.974	15.5608	24.1567	31.3
High Fat Diet	HDF1	111.363	180.909	78.0117	63.2922	84.0717	84.0717	40.4483	85.0044	129.124	57.7917	12.52	19.3361	10.0483
	HDF2	106.186	176.665	106.769	65.0006	93.5839	93.5839	56.0594	80.9117	129.166	75.0206	11.1722	19.1972	11.6283
	HDF3	78.8967	81.9917	201.725	41.3025	44.7611	44.7611	81.6683	55.2267	61.025	138.465	8.69917	9.89889	21.0983
	HDF4	173.308	111.875	240.685	85.49	63.7267	63.7267	121.083	137.287	83.7833	176.72	20.6225	14.065	29.09
	HDF5	107.9	156.891	169.21	61.9413	85.5613	85.5613	86.9475	81.3875	118.72	127.442	14.3362	20.0437	19.98
	HDF6	108.802	108.063	202.138	60.265	65.855	65.855	84.2217	83.5675	83.93	139.377	14.1288	12.9367	23.705
	HDF7	85.7517	74.4767	124.028	41.39	42.8967	42.8967	47.285	68.22	57.0533	83.73	11.0967	9.52333	13.125
